# Supplementary material
Source: MDPI journal article supplement (https://www.mdpi.com/2077-0472/12/11/1934)
Supplement: s1 [file s1]

**Table S1.** Effect of preceding crops and NPK as well as biofertilizers on the crude protein percentage of maize straw intercropping with forage cowpea and mixed during 2020 and 2021 seasons

| Crude protein percentage (CP%) |    |                    |       |               |       |                    |       |
|--------------------------------|----|--------------------|-------|---------------|-------|--------------------|-------|
| Treatment                      |    | CP% of maize straw |       | CP% of cowpea |       | CP% of mixed forge |       |
|                                |    | 2020               | 2021  | 2020          | 2021  | 2020               | 2021  |
| Berssem                        | T1 | 7.81               | 7.84  | 15.32         | 15.35 | 9.72               | 9.79  |
|                                | T2 | 7.85               | 7.90  | 15.39         | 15.42 | 9.83               | 9.82  |
|                                | T3 | 7.52               | 7.55  | 15.15         | 15.17 | 9.34               | 9.39  |
|                                | T4 | 7.61               | 7.64  | 15.20         | 15.23 | 9.49               | 9.48  |
|                                | T5 | 7.13               | 7.17  | 14.91         | 14.95 | 8.99               | 9.05  |
| S. beet                        | T1 | 7.14               | 7.11  | 15.11         | 15.13 | 9.09               | 9.07  |
|                                | T2 | 7.17               | 7.09  | 15.16         | 15.18 | 9.11               | 9.09  |
|                                | T3 | 7.06               | 7.07  | 14.90         | 14.92 | 8.82               | 8.84  |
|                                | T4 | 7.10               | 7.05  | 14.98         | 15.01 | 8.90               | 8.87  |
|                                | T5 | 6.95               | 6.91  | 14.61         | 14.63 | 8.68               | 8.69  |
| Wheat                          | T1 | 6.82               | 6.95  | 14.65         | 14.67 | 8.83               | 8.91  |
|                                | T2 | 6.86               | 6.93  | 14.70         | 14.69 | 8.92               | 8.93  |
|                                | T3 | 6.57               | 6.70  | 14.39         | 14.40 | 8.50               | 8.58  |
|                                | T4 | 6.61               | 6.75  | 14.43         | 14.45 | 8.54               | 8.60  |
|                                | T5 | 6.31               | 6.42  | 14.22         | 14.25 | 8.25               | 8.29  |
| L.S.D.at 5%                    |    | Ns                 | 0.138 | 0.053         | 0.050 | 0.088              | 0.065 |

**Table S2.** Effect of preceding crops and NPK as well as biofertilizers on the crude fiber percentage of maize straw intercropping with forage cowpea and mixed during 2020 and 2021 seasons

| Crude fiber percentage (CF%) |    |                    |       |               |       |                    |       |
|------------------------------|----|--------------------|-------|---------------|-------|--------------------|-------|
| Treatment                    |    | CF% of maize straw |       | CF% of cowpea |       | CF% of mixed forge |       |
|                              |    | 2020               | 2021  | 2020          | 2021  | 2020               | 2021  |
| Berssem                      | T1 | 38.54              | 38.17 | 18.26         | 17.74 | 33.35              | 32.87 |
|                              | T2 | 38.47              | 38.04 | 18.16         | 17.55 | 33.12              | 32.81 |
|                              | T3 | 39.49              | 38.91 | 19.30         | 18.60 | 34.68              | 34.77 |
|                              | T4 | 39.36              | 38.77 | 19.12         | 18.48 | 34.36              | 33.86 |
|                              | T5 | 40.73              | 40.05 | 20.21         | 19.68 | 35.84              | 35.10 |
| S. beet                      | T1 | 40.22              | 39.99 | 19.86         | 19.23 | 35.30              | 34.95 |
|                              | T2 | 40.09              | 39.90 | 19.64         | 19.19 | 35.11              | 34.82 |
|                              | T3 | 41.33              | 41.05 | 20.91         | 20.42 | 36.73              | 36.41 |
|                              | T4 | 41.21              | 41.01 | 20.59         | 19.99 | 36.51              | 36.2  |
|                              | T5 | 42.39              | 42.12 | 21.75         | 21.22 | 37.73              | 37.28 |
| Wheat                        | T1 | 42.47              | 41.96 | 22.15         | 21.73 | 37.26              | 36.82 |
|                              | T2 | 42.32              | 41.87 | 22.01         | 21.33 | 37.00              | 36.58 |
|                              | T3 | 43.29              | 43.35 | 23.09         | 22.75 | 38.29              | 38.32 |
|                              | T4 | 43.18              | 43.26 | 22.85         | 22.51 | 38.22              | 38.35 |
|                              | T5 | 44.44              | 44.21 | 24.05         | 23.33 | 39.49              | 39.21 |
| L.S.D.at 5%                  |    | Ns                 | Ns    | Ns            | 0.670 | ns                 | 1.020 |

**Table S3.** Effect of preceding crops and NPK as well as biofertilizers on the crude ash percentage of maize straw intercropping with forage cowpea and mixed during 2020 and 2021 seasons

| Crude ash percentage (CA%) |    |                    |       |               |       |                    |       |
|----------------------------|----|--------------------|-------|---------------|-------|--------------------|-------|
| Treatment                  |    | CA% of maize straw |       | CA% of cowpea |       | CA% of mixed forge |       |
|                            |    | 2020               | 2021  | 2020          | 2021  | 2020               | 2021  |
| Berseem                    | T1 | 9.83               | 10.12 | 16.85         | 17.25 | 11.66              | 11.97 |
|                            | T2 | 9.97               | 10.25 | 17.02         | 17.41 | 11.82              | 12.08 |
|                            | T3 | 8.90               | 9.08  | 15.90         | 16.23 | 10.59              | 10.80 |
|                            | T4 | 9.09               | 9.20  | 16.06         | 16.43 | 10.81              | 10.95 |
|                            | T5 | 7.88               | 8.12  | 14.87         | 15.33 | 9.54               | 9.87  |
| S. beet                    | T1 | 8.85               | 9.10  | 16.35         | 16.50 | 10.66              | 10.90 |
|                            | T2 | 8.99               | 9.26  | 16.41         | 17.01 | 10.80              | 11.16 |
|                            | T3 | 7.82               | 8.15  | 15.30         | 15.66 | 9.51               | 9.84  |
|                            | T4 | 7.89               | 8.21  | 15.46         | 15.84 | 9.62               | 9.96  |
|                            | T5 | 6.89               | 7.18  | 14.38         | 14.75 | 8.58               | 8.93  |
| Wheat                      | T1 | 8.08               | 8.27  | 15.38         | 15.36 | 9.96               | 10.04 |
|                            | T2 | 8.17               | 8.45  | 15.62         | 16.02 | 10.13              | 10.40 |
|                            | T3 | 7.09               | 7.32  | 14.07         | 14.59 | 8.82               | 9.10  |
|                            | T4 | 7.14               | 7.40  | 14.12         | 14.77 | 8.87               | 9.14  |
|                            | T5 | 5.97               | 6.36  | 13.36         | 13.68 | 7.78               | 8.11  |
| L.S.D.at 5%                |    | Ns                 | ns    | 0.087         | 0.060 | 0.131              | 0.118 |
